# Supplementary material for: Diosgenin-conjugated PCL–MPEG polymeric nanoparticles for the co-delivery of anticancer drugs: design, optimization, in vitro drug release and evaluation of anticancer activity
Source: Royal Society of Chemistry journal article supplement (doi:10.1039/c9nj00659a), 2019-01-01
Supplement: c9nj00659a1.pdf [file c9nj00659a1.pdf]

Supporting Information for New Journal of Chemistry for:

**Diosgenin conjugated PCL-MPEG polymeric nanoparticles for co-delivery of anticancer drugs: Design, optimization, *in vitro* drug release and evaluation of anticancer activity**

**Sevinc Ilkar Erdagi, Ufuk Yildiz\***

Department of Chemistry, Kocaeli University, 41380, Kocaeli, Turkey

**Table of Contents:**

|                                                                                                                                      |    |
|--------------------------------------------------------------------------------------------------------------------------------------|----|
| 1. Characterization of PCL-MPEG polymers with diosgenin derivatives.....                                                             | S2 |
| 2. Fig. S1. FTIR (up) and <sup>1</sup> H-NMR (down) spectra of M1-PCL-MPEG copolymers.....                                           | S3 |
| 3. Fig. S2. FTIR (up) and <sup>1</sup> H-NMR (down) spectra of M2-PCL-MPEG copolymers.....                                           | S4 |
| 4. Fig. S3. FTIR (up) and <sup>1</sup> H-NMR (down) spectra of M3-PCL-MPEG copolymers.....                                           | S5 |
| 5. Fig. S4. GPC Chromatograms of a) mPEG-COOH b) M4-PCL c) M4-PCL-MPEG.....                                                          | S6 |
| 6. Fig. S5. TEM images of a) M1-ITB-NP b) M2-ITB-NP c) M3-ITB-NP.....                                                                | S6 |
| 7. Fig. S6. Drug release profiles from NPs and ITB-loaded NPs (A: ITB pH: 3.5, B: ITB pH: 7.4, C: DGN pH: 3.5, and DGN pH: 7.4)..... | S7 |
| 8. Fig. S7. Cell viability of ITB loaded NPs (A: L929, B: MCF-7, C: SAOS-2, and D: K562)..                                           | S8 |
| 9. Table S1. ANOVA of formulations influencing the cell viability.....                                                               | S8 |

## 1. Characterization of PCL-MPEG polymers with diosgenin derivatives

### Synthesis of M1-PCL-MPEG

Yield: 94 %, white solid. FT-IR (ATR,  $\text{cm}^{-1}$ ): 3530, 2950, 2850, 1735, 1470, 1240, 1100, 1050, 950, 840. GPC (PS, THF, 0.5 ml/dk):  $M_n$ : 15800,  $M_w$ : 24020, PDI; 1.52.  $^1\text{H-NMR}$  (500 MHz,  $\text{CDCl}_3$ ,  $\delta$ , ppm): 5.37 (s, 1H,  $\text{H}_b$ ), 4.60 (m, 1H,  $\text{H}_a$ ), 4.37 (m, 1H,  $\text{H}_c$ ), 4.24 (t, 2H,  $-\text{CH}_2\text{OCO}-$ ), 4.06 (t, ( $\text{CH}_2\text{O}(\text{C}=\text{O})$  PCL), 3.65 (m, 4H,  $-\text{O}(\text{CH}_2\text{CH}_2\text{O})-$ ), 3.36 (s, 3H,  $\text{CH}_3\text{-O}-$ ), 2.62 (t, 4H,  $-\text{OCOCH}_2\text{CH}_2\text{COO}-$ ), 2.30 (t, ( $\text{O}(\text{C}=\text{O})\text{CH}_2$ ) PCL), 1.64 (t, ( $\text{O}(\text{C}=\text{O})\text{CH}_2\text{CH}_2\text{CH}_2\text{CH}_2\text{O}(\text{C}=\text{O})$ )PCL), 1.37 (t, ( $\text{O}(\text{C}=\text{O})\text{CH}_2\text{CH}_2\text{CH}_2\text{CH}_2\text{CH}_2\text{O}(\text{C}=\text{O})$ ) PCL).

### Synthesis of M2-PCL-MPEG

Yield: 88 %, white solid. FT-IR (ATR,  $\text{cm}^{-1}$ ): 3530, 2950, 2850, 1735, 1470, 1240, 1100, 1050, 950, 840. GPC (PS, THF, 0.5 ml/dk):  $M_n$ : 15500,  $M_w$ : 22200, PDI; 1.43.  $^1\text{H-NMR}$  (500 MHz,  $\text{CDCl}_3$ ,  $\delta$ , ppm): 4.68 (m, 2H,  $\text{H}_a$ ,  $\text{H}_b$ ), 4.38 (m, 1H,  $\text{H}_c$ ), 4.23 (t, 2H,  $-\text{CH}_2\text{CH}_2\text{OCO}-$ ), 4.06 (t, ( $\text{CH}_2\text{O}(\text{C}=\text{O})$  PCL), 3.63 (m, 4H,  $-\text{O}(\text{CH}_2\text{CH}_2\text{O})-$ ), 3.37 (s, 3H,  $\text{CH}_3\text{-O}-$ ), 2.62 (t, 4H,  $-\text{OCOCH}_2\text{CH}_2\text{COO}-$ ), 2.30 (t, ( $\text{O}(\text{C}=\text{O})\text{CH}_2$ ) PCL), 1.63 (t, ( $\text{O}(\text{C}=\text{O})\text{CH}_2\text{CH}_2\text{CH}_2\text{CH}_2\text{O}(\text{C}=\text{O})$ )PCL), 1.37 (t, ( $\text{O}(\text{C}=\text{O})\text{CH}_2\text{CH}_2\text{CH}_2\text{CH}_2\text{CH}_2\text{O}(\text{C}=\text{O})$ ) PCL).

### Synthesis of M3-PCL-MPEG

Yield: 91%, White solid. FT-IR (ATR,  $\text{cm}^{-1}$ ): 3530, 2950, 2850, 1735, 1470, 1240, 1100, 1050, 950, 840. GPC (PS, THF, 0.5 ml/dk):  $M_n$ : 15400,  $M_w$ : 20800, PDI; 1.35.  $^1\text{H-NMR}$  (500 MHz,  $\text{CDCl}_3$ ,  $\delta$ , ppm): 5.35 (br, s, 1H,  $\text{H}_b$ ), 4.59 (m, 1H,  $\text{H}_a$ ), 4.29 (m, 1H,  $\text{H}_c$ ), 4.20 (t, 2H,  $-\text{CH}_2\text{CH}_2\text{OCO}-$ ), 4.04 (t, ( $\text{CH}_2\text{O}(\text{C}=\text{O})$  PCL), 3.95-3.84 (m, 2H,  $\text{H}_{\text{ABX}}$ ), 3.63 (m, 4H,  $-\text{O}(\text{CH}_2\text{CH}_2\text{O})-$ ), 3.37 (s, 3H,  $\text{CH}_3\text{-O}-$ ), 3.29 (m, 1H,  $\text{H}_d$ ), 2.42 (t, 4H,  $-\text{OCOCH}_2\text{CH}_2\text{COO}-$ ), 2.30 (t, ( $\text{O}(\text{C}=\text{O})\text{CH}_2$ ) PCL), 1.63 (t, ( $\text{O}(\text{C}=\text{O})\text{CH}_2\text{CH}_2\text{CH}_2\text{CH}_2\text{O}(\text{C}=\text{O})$ ) PCL), 1.37 (t, ( $\text{O}(\text{C}=\text{O})\text{CH}_2\text{CH}_2\text{CH}_2\text{CH}_2\text{CH}_2\text{O}(\text{C}=\text{O})$ ) PCL).

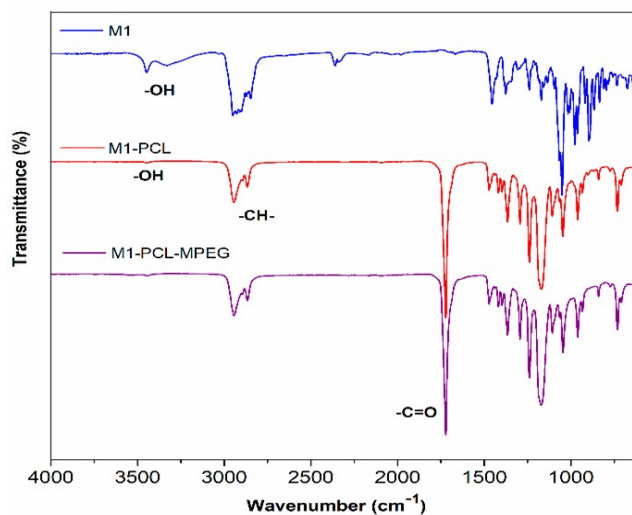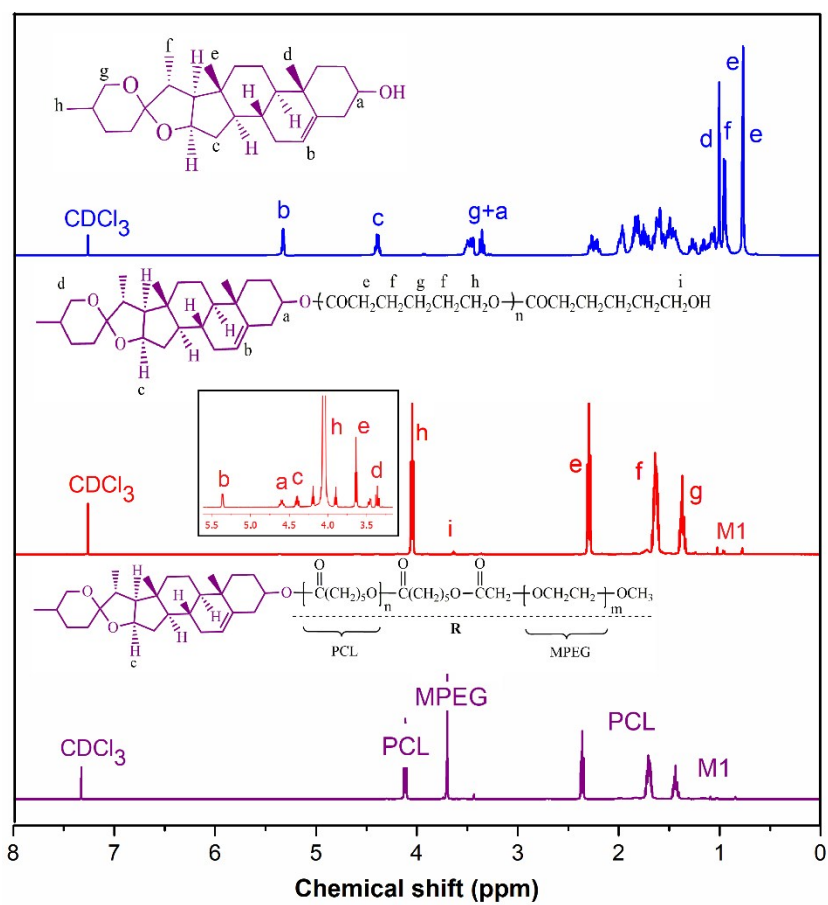

Figure S1 FTIR (up) and  $^1\text{H-NMR}$  (down) spectra of M1-PCL-MPEG copolymers.

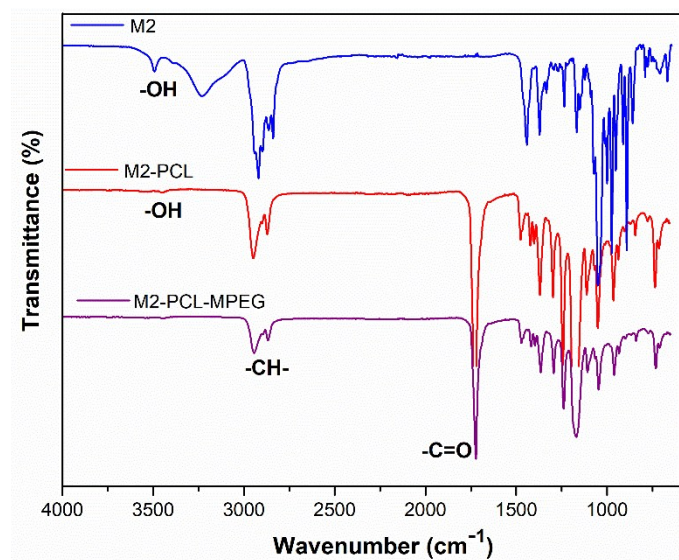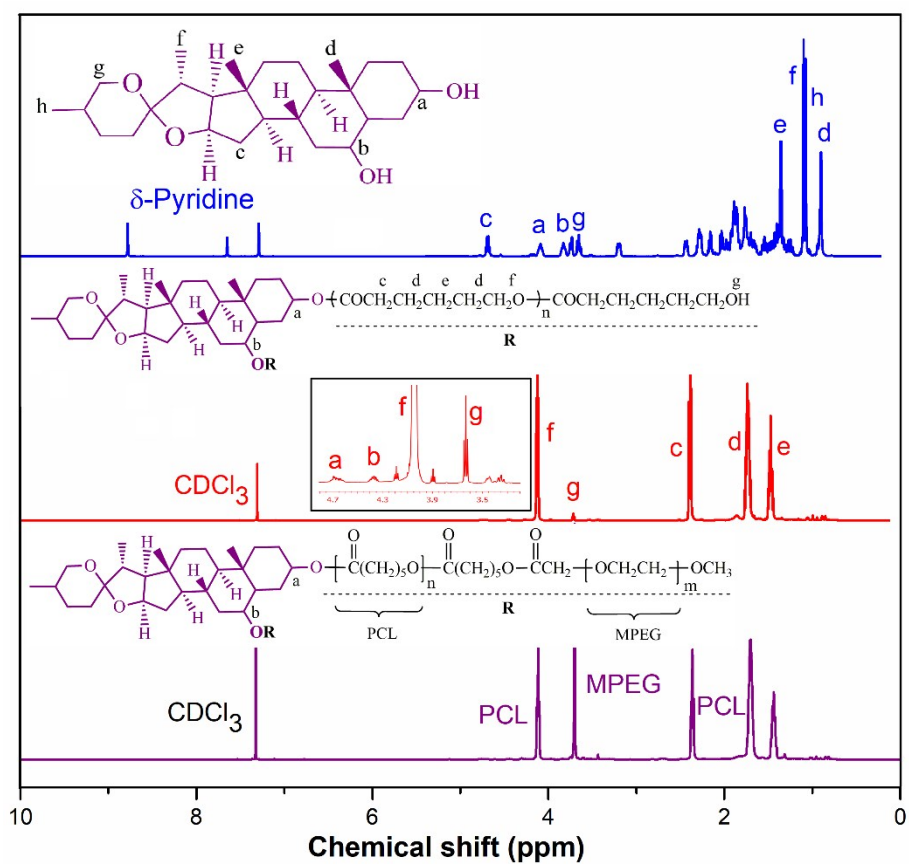

Figure S2 FTIR (up) and <sup>1</sup>H-NMR (down) spectra of M2-PCL-MPEG copolymers.

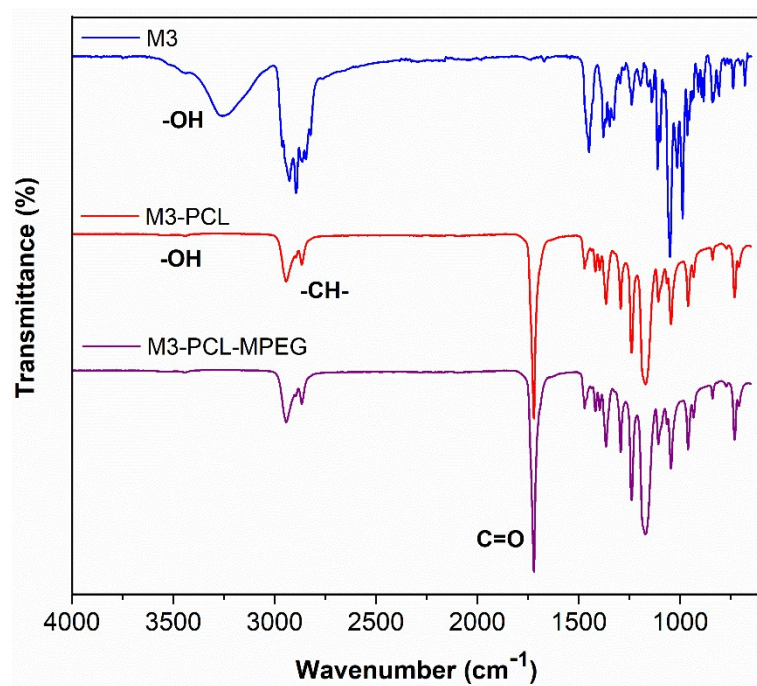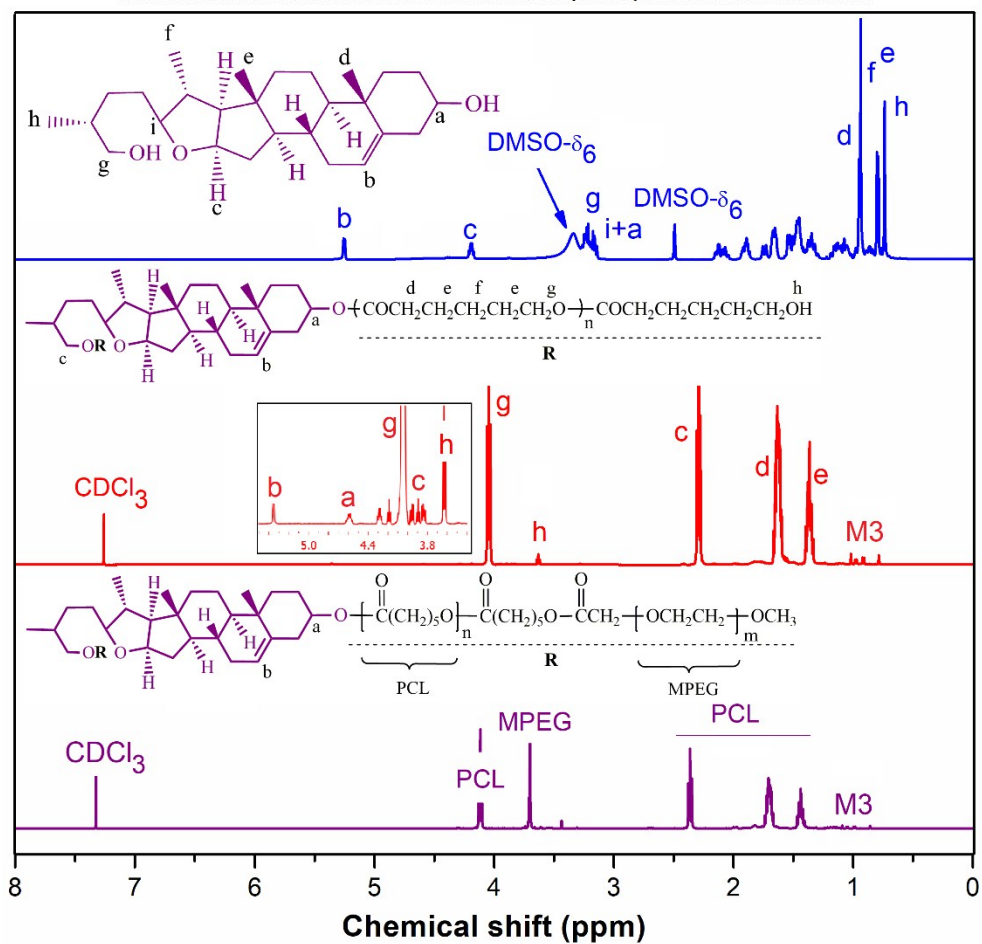

Figure S3 FTIR (up) and  $^1\text{H-NMR}$  (down) spectra of M3-PCL-MPEG copolymers.

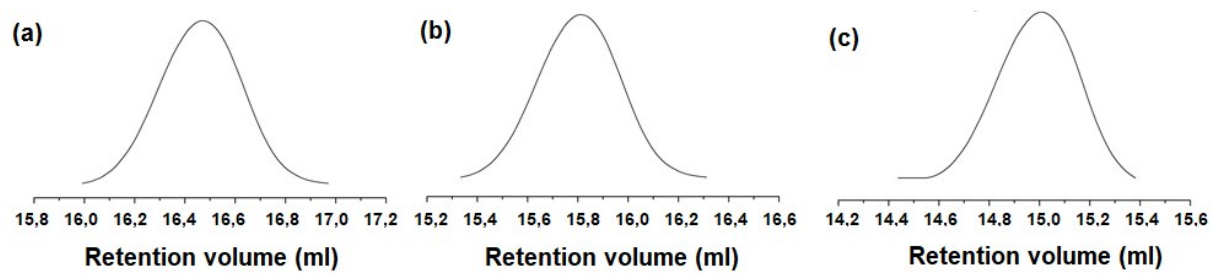

Figure S4 GPC Chromatograms of a) mPEG-COOH b) M4-PCL c) M4-PCL-MPEG.

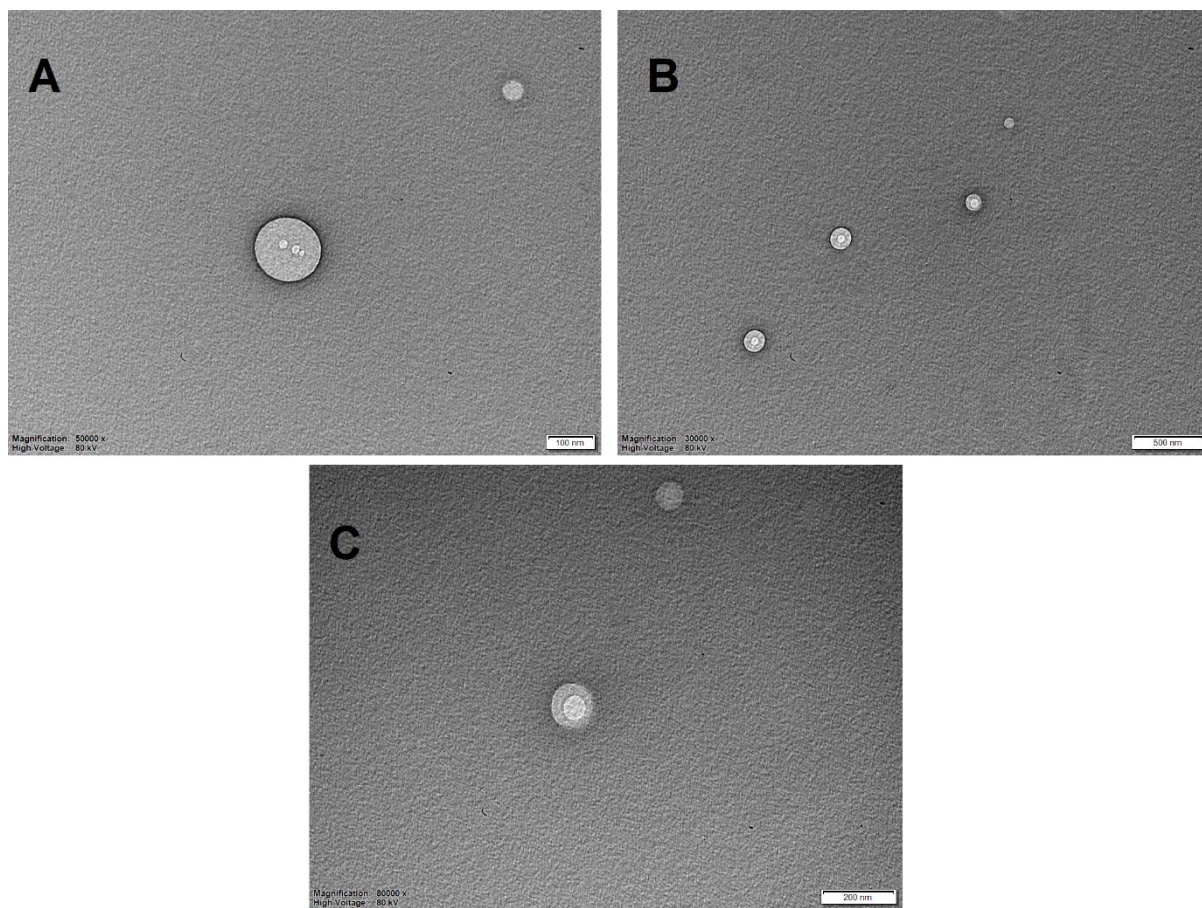

Figure S5 TEM images of a) M1-ITB-NP b) M2-ITB-NP c) M3-ITB-NP.

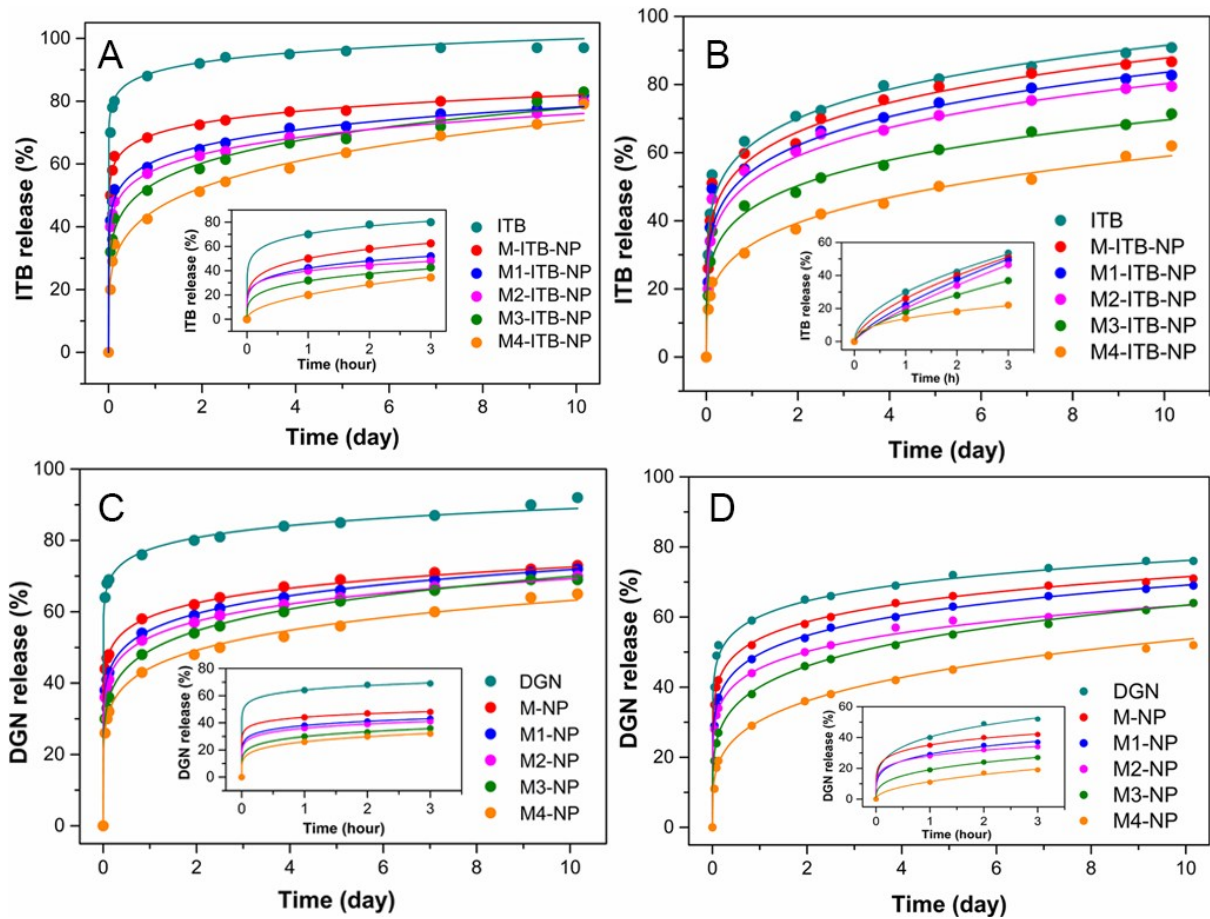

Figure S6 Drug release profiles from NPs and ITB-loaded NPs (A: ITB pH: 3.5, B: ITB pH: 7.4, C: DGN pH: 3.5, and DGN pH: 7.4).

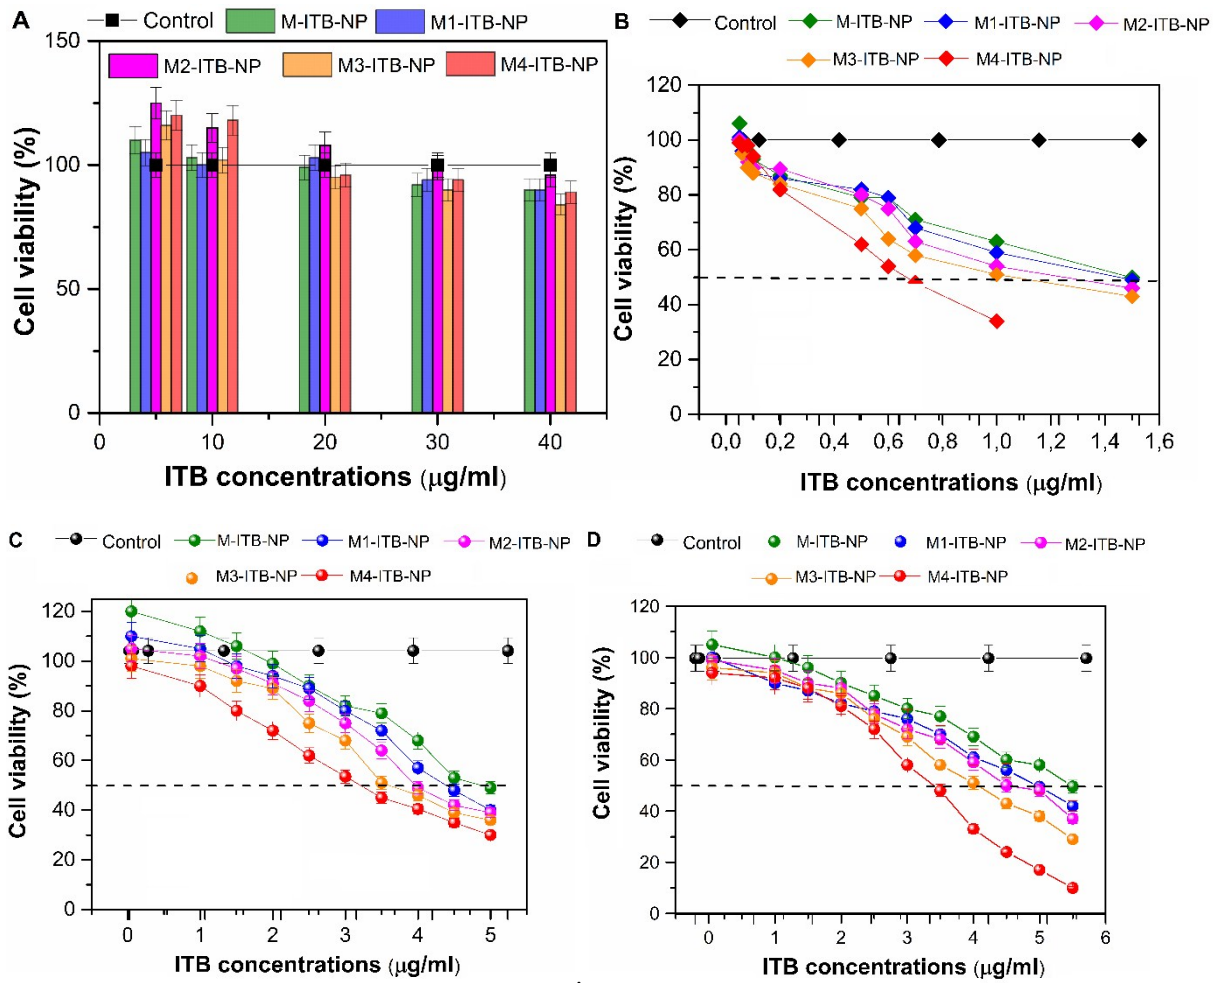

Figure S7 Cell viability of ITB loaded NPs (A: L929, B: MCF-7, C: SAOS-2, and D: K562).

Table S1. ANOVA of formulations influencing the cell viability.

| Cell Type | Formulation | ANOVA results  |             |          |                  |                |
|-----------|-------------|----------------|-------------|----------|------------------|----------------|
|           |             | Sum of Squares | Mean Square | F value  | <i>P</i> -value* | Adj. R-Squared |
| MCF-7     | ITB         | 1973.80        | 493.45      | 1788.64  | <0.0001          | 0.996          |
|           | DGN         | 7513.82        | 1878.45     | 20208.96 | <0.0001          | 0.998          |
|           | M4-NP       | 5598.53        | 1399.63     | 9537.75  | 0                | 0.998          |
|           | M4-ITB-NP   | 5499.21        | 1374.80     | 136.40   | <0.0001          | 0.939          |
| SAOS-2    | ITB         | 3596.13        | 899.03      | 1163.46  | <0.0001          | 0.991          |
|           | DGN         | 3598.22        | 899.55      | 2535.43  | <0.0001          | 0.988          |
|           | M4-NP       | 4799.26        | 1199.81     | 13070.05 | <0.0001          | 0.998          |
|           | M4-ITB-NP   | 4799.41        | 1199.85     | 16433.99 | <0.0001          | 0.998          |
| K562      | ITB         | 3996.06        | 999.01      | 1524.33  | <0.0001          | 0.995          |
|           | DGN         | 3999.78        | 999.94      | 27817.71 | <0.0001          | 0.999          |
|           | M4-NP       | 5199.23        | 1299.80     | 15212.21 | 0                | 0.997          |
|           | M4-ITB-NP   | 5195.34        | 1298.83     | 2508.73  | <0.0001          | 0.997          |

\* *P*-values < 0.05 were considered as statistically significant.
